# Supplementary material for: Reelin-Haploinsufficiency Disrupts the Developmental Trajectory of the E/I Balance in the Prefrontal Cortex
Source: PubMed Central journal article supplement (PMC5226963; doi:10.3389/fncel.2016.00308), 2017-01-12
Supplement: Data_Sheet_1.pdf [file Data_Sheet_1.pdf]

**A****B****C****D**

Supplementary Figure 1

**Supplementary Figure 1: Intrinsic properties of layer 5/6 PrPFC pyramidal neurons in wild-type and HRM neurons.**

**(A)** Tri-dimensional reconstructed confocal image of layer 5 PrPFC pyramidal neuron filled with neurobiotin during whole-cell recording. Staining and reconstruction were performed as previously described (Iafrazi et al. 2014).

**(B)** Typical membrane responses to somatic current step recorded from wild-type and HRM layer 5/6 PrPFC pyramidal neurons (calibration: 100 mV, 20 ms).

**(C)** Current-voltage curves corresponding to the two neurons illustrated in **B**. Changes in membrane potential in response to hyperpolarizing and depolarizing current steps.

**(D)** Current-firing curves indicating the number of evoked action potentials in response to somatic current steps for the two neurons showed in **B**.



Supplementary Figure 2

**Supplementary Figure 2: Properties of AMPA-sEPSCs during maturation.**

**(A)** Average amplitudes were similar during maturation and between genotypes ( $F_{(7,78)}=1.158$ ,  $P=0.3366$ , ANOVA). Values were in Pw:  $17.0 \pm 1.2$  pA, n=8 cells/4 mice wild-type and  $18.5 \pm 1.0$  pA, n=11/6 mice HRM; Juv:  $16.8 \pm 1.0$  pA, n=8/6 mice wild-type and  $17.1 \pm 1.0$  pA, n=12/7 mice HRM; Ado:  $18.5 \pm 1.1$  pA, n=7/4 mice wild-type and  $19.3 \pm 0.8$  pA, n=16/7 mice HRM; Adu:  $17.5 \pm 0.8$  pA, n=11/9 mice wild-type and  $19.3 \pm 1.2$ , n=13/6 mice HRM.

**(B)** The mean frequency increased in wildtype between pre-weaning and adolescent period ( $1.5 \pm 0.2$  Hz at P14-20,  $2.8 \pm 0.4$  Hz at P22-28,  $3.3 \pm 0.4$  Hz at P30-45 and  $2.1 \pm 0.3$  Hz at P50-90;  $F_{(3,31)}=4.503$ ,  $P=0.0098$ , ANOVA) whereas it was not different in HRM during maturation ( $1.9 \pm 0.3$  Hz at P14-20,  $3.4 \pm 0.3$  Hz at P22-28,  $3.1 \pm 0.3$  Hz at P30-45 and  $2.6 \pm 0.4$  Hz at P50-90;  $F_{(3,48)}=2.830$ ,  $P=0.0482$ , ANOVA).

Error bars represent SEM. \*  $P < 0.05$ .
